# Supplementary material for: Extended Targeted and Non-Targeted Strategies for the Analysis of Marine Toxins in Mussels and Oysters by (LC-HRMS)
Source: PubMed Central journal article supplement (PMC6162736; doi:10.3390/toxins10090375), 2018-09-14
Supplement: toxins-10-00375-s001.pdf [file toxins-10-00375-s001.pdf]

# Supplementary Materials: Extended Targeted and Non-Targeted Strategies for the Analysis of Marine Toxins in Mussels and Oysters by LC-HRMS

Inès Dom, Ronel Biré, Vincent Hort, Gwenaëlle Lavison-Bompard, Marina Nicolas and Thierry Guérin

**Table S1.** Chemical formula, detected ion, measured mass, m/z ( $n = 15$ ) and retention time for each toxin in mussel extracts obtained on 5600 QTOF. (Mass accuracy and precision expressed by mass errors and SD expressed as ppm are presented in Figure S1).

| Toxin          | Formula     | Detected Ion                        | Measured m/z | Rt (min) |
|----------------|-------------|-------------------------------------|--------------|----------|
| GYM            | C32H45NO4   | [M + H] <sup>+</sup>                | 508.34199    | 5.2      |
| PnTX-A         | C41H61NO9   | [M + H] <sup>+</sup>                | 712.44159    | 5.4      |
| PnTX-G         | C42H63NO7   | [M + H] <sup>+</sup>                | 694.46766    | 6.2      |
| AZA1           | C47H71NO12  | [M + H] <sup>+</sup>                | 842.50422    | 8.9      |
| AZA2           | C48H73NO12  | [M + H] <sup>+</sup>                | 856.52089    | 8.5      |
| AZA3           | C46H69NO12  | [M + H] <sup>+</sup>                | 828.48848    | 9.2      |
| SPX1           | C42H61NO7   | [M + H] <sup>+</sup>                | 692.45141    | 5.7      |
| 13,19-didesMeC | C41H59NO7   | [M + H] <sup>+</sup>                | 678.43677    | 5.3      |
| 20-meG         | C43H63NO7   | [M + H] <sup>+</sup>                | 706.46795    | 5.8      |
| PTX2           | C47H70O14   | [M + NH <sub>4</sub> ] <sup>+</sup> | 876.51096    | 8.8      |
| PbTx-2         | C50H70O14   | [M + H] <sup>+</sup>                | 895.48384    | 10.0     |
| PbTx-3         | C50H72O14   | [M - H] <sup>+</sup>                | 897.43994    | 9.1      |
| DA             | C15H21NO6   | [M - H] <sup>-</sup>                | 310.12961    | 3.5      |
| OA             | C44H68O13   | [M - H] <sup>-</sup>                | 803.46169    | 7.5      |
| DTX1           | C45H70O13   | [M - H] <sup>-</sup>                | 817.4762     | 8.6      |
| DTX2           | C44H68O13   | [M - H] <sup>-</sup>                | 803.46169    | 7.9      |
| YTX            | C55H82O21S2 | [M - H] <sup>-</sup>                | 1141.47295   | 9.2      |
| hYTX           | C56H84O21S2 | [M - H] <sup>-</sup>                | 1155.48869   | 9.2      |

**Table S2.** Determination coefficients ( $R^2$ ) for both solvent and matrix-matched calibration curves.

| Toxin          | Concentration Range ( $\mu\text{g}/\text{kg}$ ) | $R^2$  |        |        |
|----------------|-------------------------------------------------|--------|--------|--------|
|                |                                                 | MeOH   | Mussel | Oyster |
| AZA1           | 10–120                                          | 0.9961 | 0.9939 | 0.9965 |
| AZA2           | 10–120                                          | 0.9963 | 0.9920 | 0.9938 |
| AZA3           | 10–120                                          | 0.9953 | 0.9946 | 0.9919 |
| PTX2           | 20–240                                          | 0.9959 | 0.9927 | 0.9948 |
| GYM-A          | 10–120                                          | 0.9973 | 0.9981 | 0.9988 |
| SPX1           | 10–120                                          | 0.9972 | 0.9935 | 0.9946 |
| PnTX-A         | 10–120                                          | 0.9979 | 0.9966 | 0.9968 |
| PnTX-G         | 10–120                                          | 0.9981 | 0.9974 | 0.9949 |
| 13,19-didesMeC | 10–120                                          | 0.9974 | 0.9962 | 0.9969 |
| 20-meG         | 10–120                                          | 0.9970 | 0.9958 | 0.9977 |
| OA             | 20–240                                          | 0.9975 | 0.9966 | 0.9982 |
| DTX1           | 20–240                                          | 0.9982 | 0.9990 | 0.9969 |
| DTX2           | 20–240                                          | 0.9917 | 0.9926 | 0.9906 |
| DA             | 60–720                                          | 0.9930 | 0.9931 | 0.9905 |

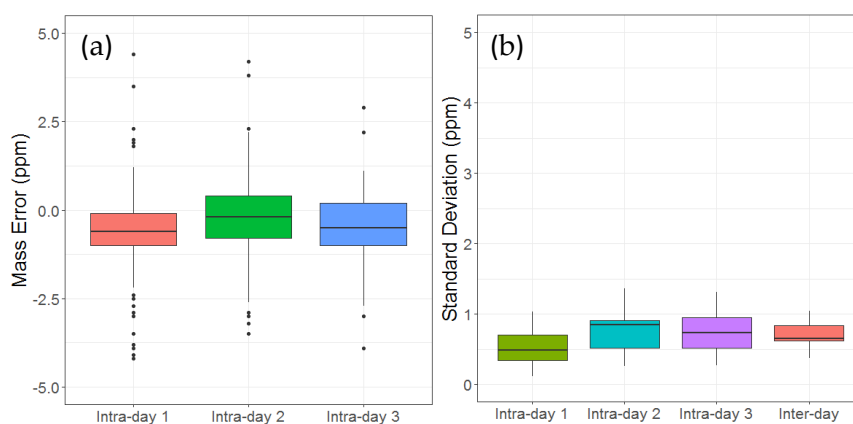

**Figure S1.** Mass variations (mass-to-charge-ratio) for the toxins (positive and negative ion mode); measurement of the replicates of spiked mussel extracts (five-times injections (inter-day) at three different dates (intra-day)). (a): Boxplot of the mass errors related to the theoretical exact mass. (b): Boxplot of the intra-day and inter-day precision (SD) of the mass error.

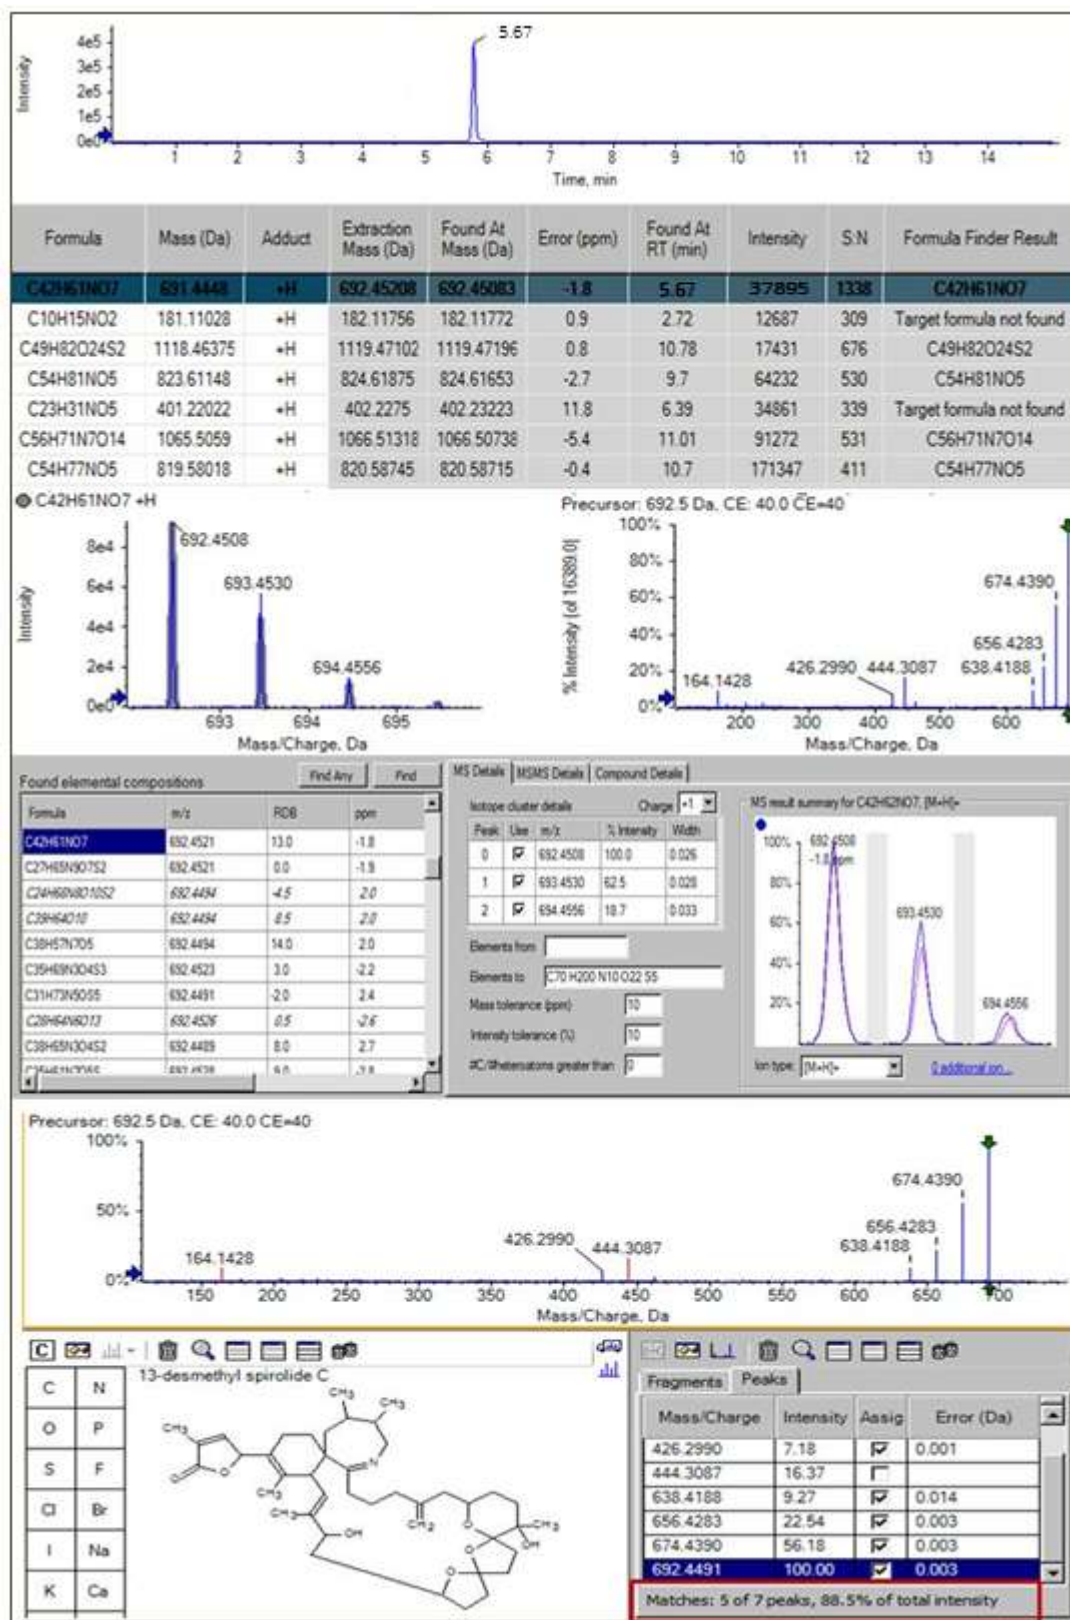

**Figure S2.** Example of tentative identification of non-targeted compound; identification of 13-desmethyl spiroside was achieved by generation of theoretical chemical formula based on accurate mass, isotopic distribution using formula finder. Elemental formula is screened through ChemSpider database to generate possible structures. Proposed molecular structures were checked by comparing experimental MS/MS fragment spectra to theoretical fragmentation.

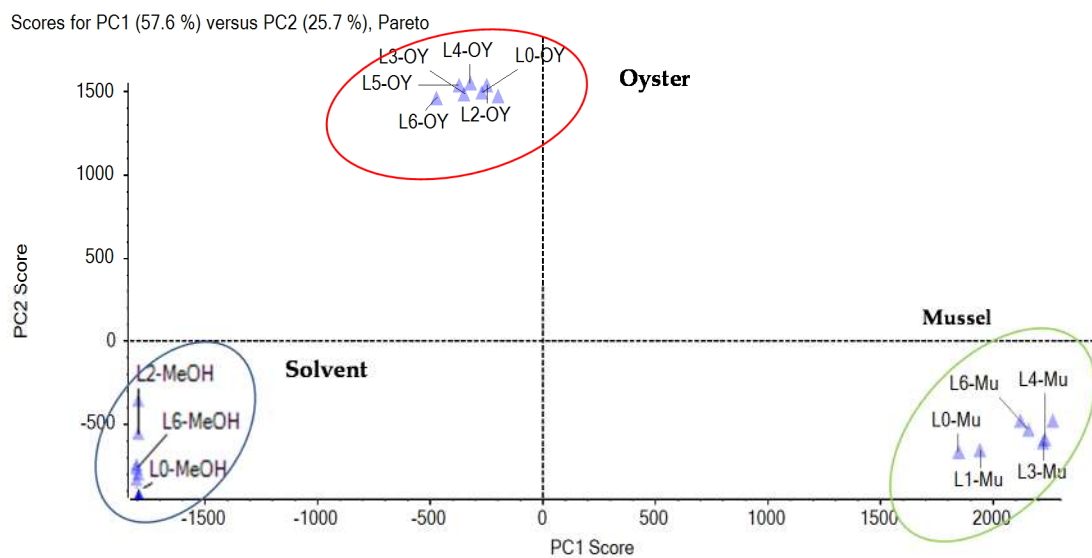

**Figure S3.** Scores plot of a PCA analysis of the data generated after analyzing contaminated and non-contaminated extracts (MeOH, mussel, and oyster) by LC-HRMS in ESI<sup>+</sup>.

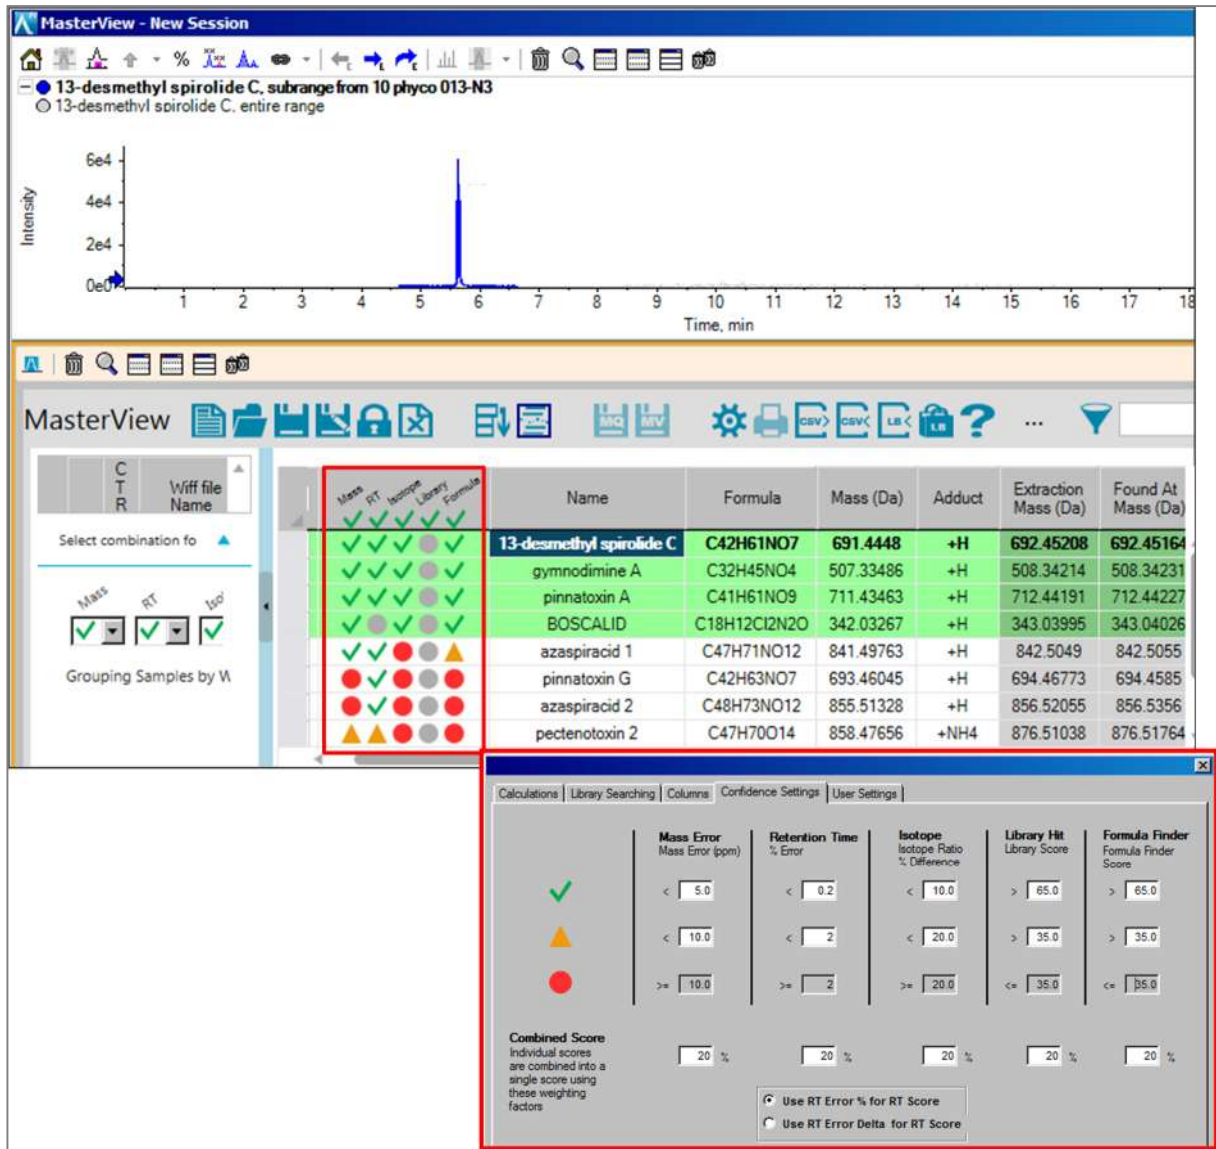

Figure S4. Example of result display of the MasterView software using “traffic lights” and selected confidence setting for target compounds identification.
